# Supplementary material for: Tuning the buried interface with d-sorbitol-modified mixed SAMs for high-efficiency inverted perovskite solar cells
Source: Royal Society of Chemistry journal article supplement (doi:10.1039/d6ra01990k), 2026-04-17
Supplement: d6ra01990k1.pdf [file d6ra01990k1.pdf]

## Supporting Information

### Tuning the Buried Interface with D-Sorbitol-Modified Mixed SAMs for High-Efficiency

#### Inverted Perovskite Solar Cells

<sup>1,\*</sup>Adem Mutlu, <sup>1,2</sup>Necip Ali Tuna, <sup>1</sup>Destan Toksoz, <sup>3</sup>Cem Tozlu

<sup>1</sup>*Ege University, Solar Energy Institute, 35100, Izmir, Türkiye*

<sup>2</sup>*Department of Materials Science and Engineering, Izmir Katip Celebi University, Izmir, Türkiye*

<sup>3</sup>*Graphene Application and Research Center, Izmir Katip Celebi University, Cigli, 35620 Izmir, Türkiye*

**\*Corresponding author E-mail:** [adem.mutlu@ege.edu.tr](mailto:adem.mutlu@ege.edu.tr)

This file includes:

Figure S1 to S9

Table S1 to S3

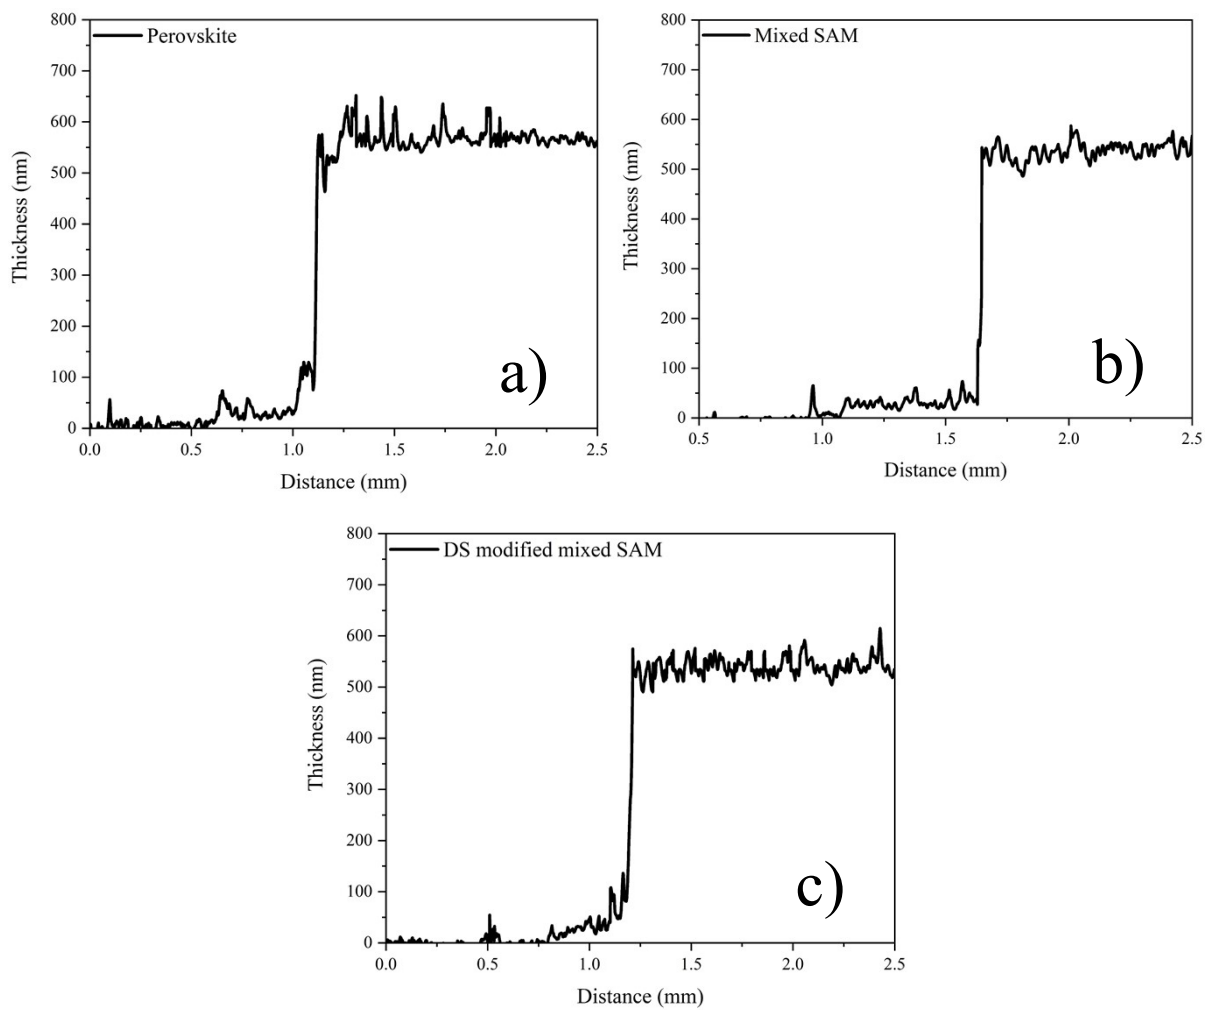

**Figure S1.** Stylus profilometry thickness profiles of perovskite films deposited on different buried-contact configurations: (a) FTO/perovskite, (b) FTO/Mixed-SAM/perovskite, and (c) FTO/DS-modified Mixed-SAM/perovskite.

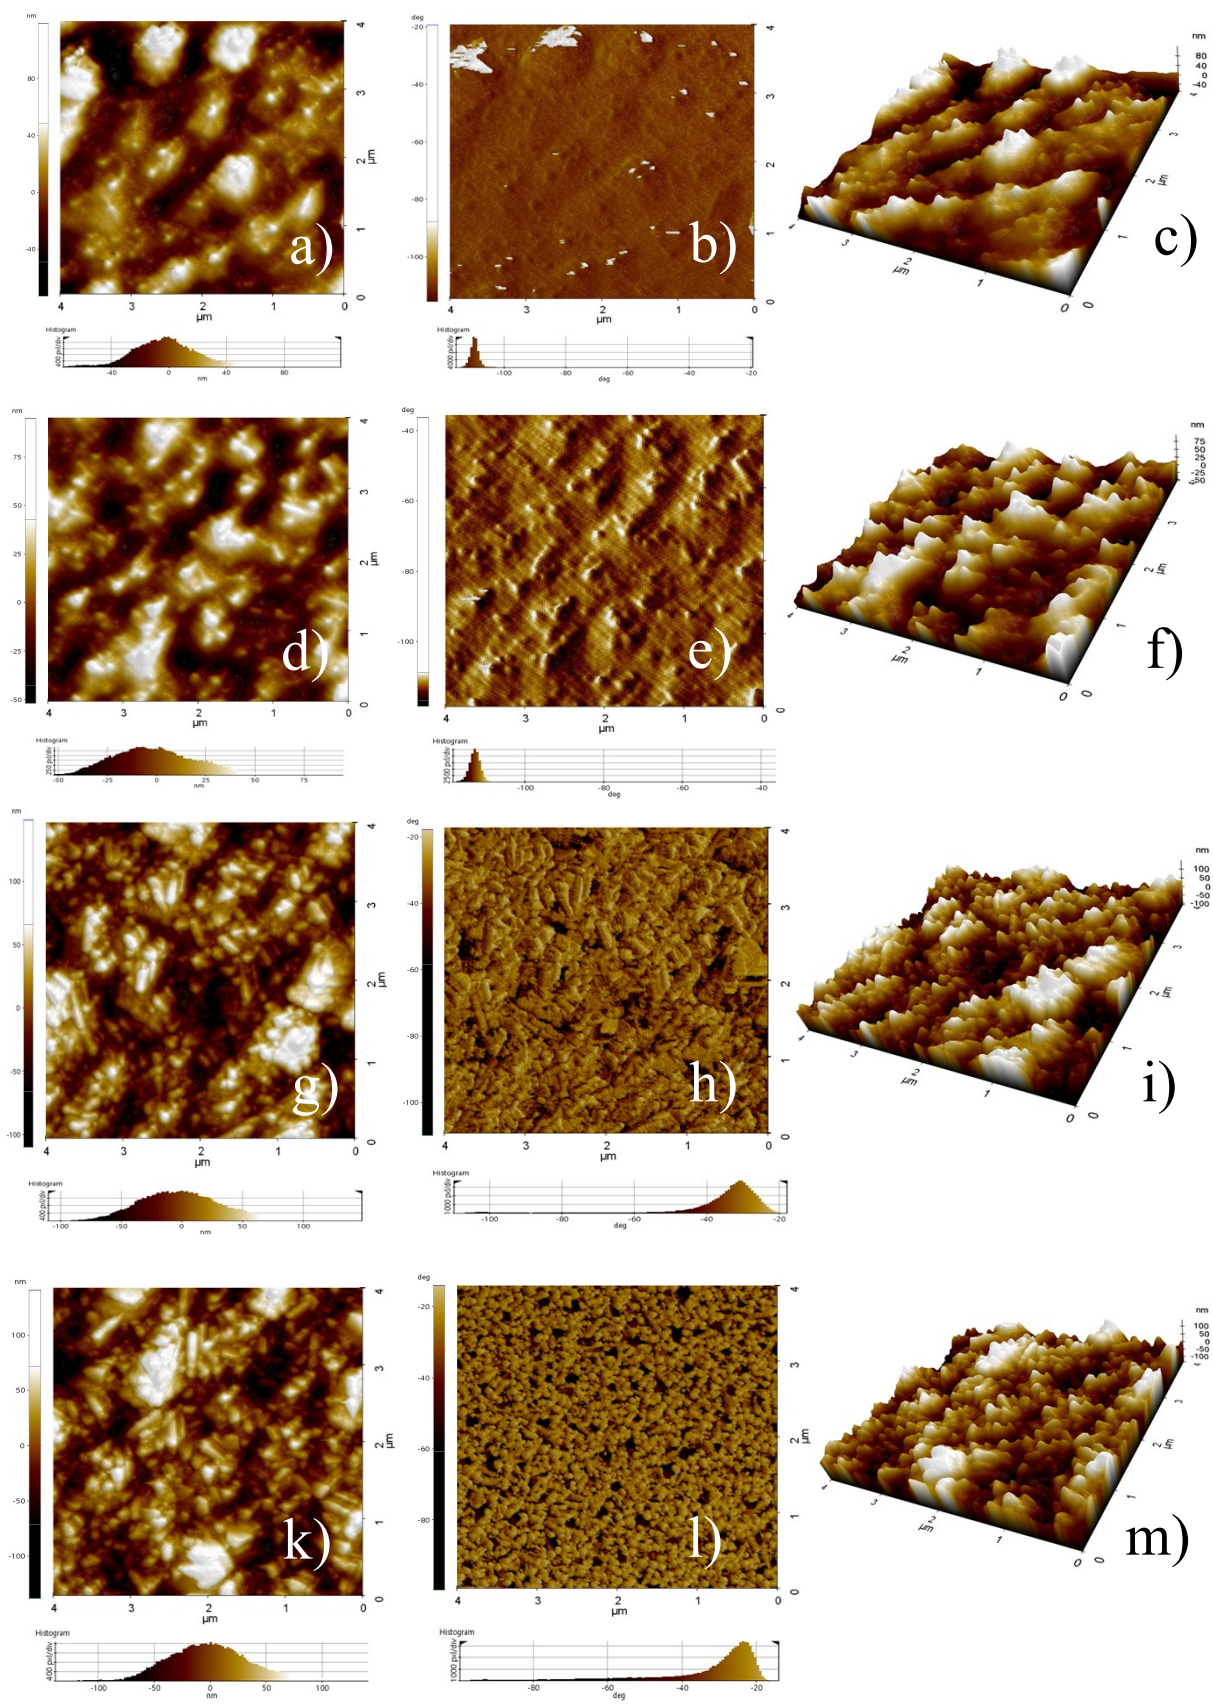

**Figure S2.** High-haze FTO: AFM topography, phase and 3D images of (a-c) bare FTO, (d-f) FTO/Mixed SAM (no rinse), (g-i) FTO/Mixed SAM (IPA rinsed), and (l-m) FTO/DS modified mixed SAM (DS in IPA) thin films.

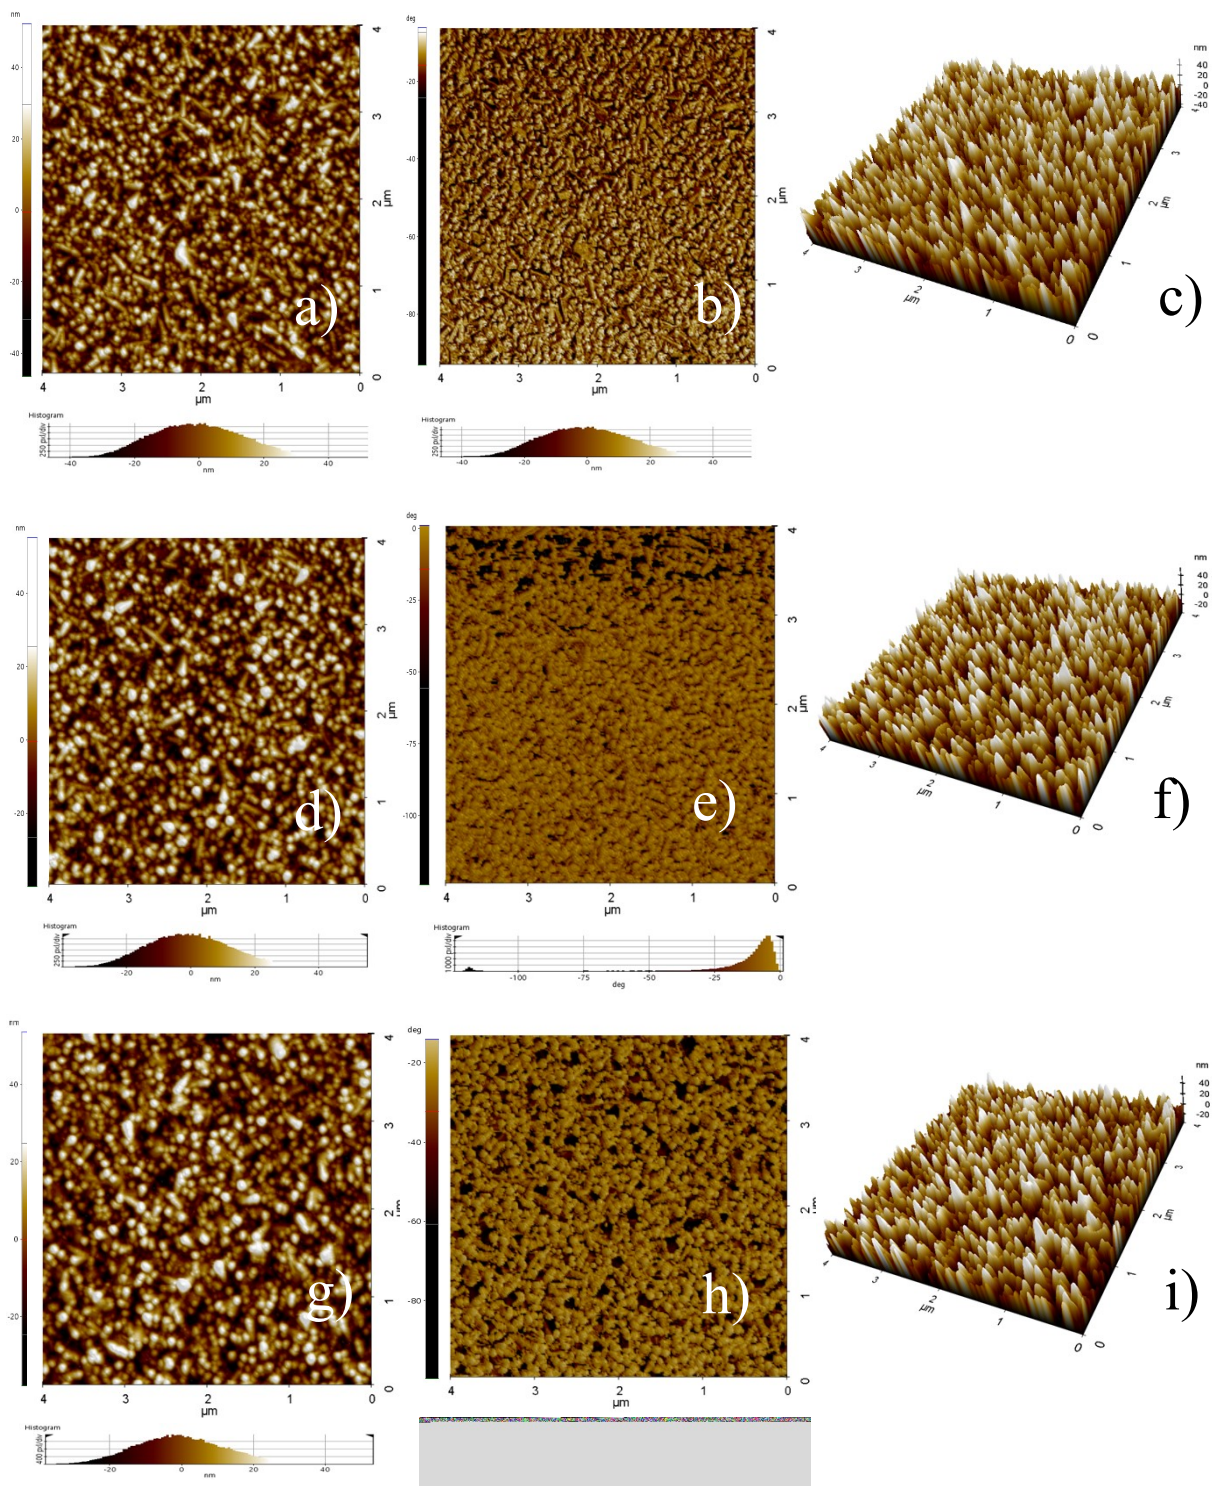

**Figure S3.** Low-haze FTO: AFM topography, phase and 3D images of (a-c) bare FTO, (d-f) FTO/Mixed SAM (IPA rinsed) and (g-i) FTO/DS modified mixed SAM (DS in IPA) thin films.

**Table S1.** AFM topography and phase metrics for mixed-SAM and DS-modified mixed-SAM on low and high-haze FTO (scan area:  $4 \times 4 \mu\text{m}^2$ ).

| Substrate / treatment                                 | Topography $R_q$ (nm) | Topography $R_{pv}$ (nm) | Phase mean (deg) | Phase $R_q$ (deg) |
|-------------------------------------------------------|-----------------------|--------------------------|------------------|-------------------|
| High-haze FTO (bare)                                  | 24.905                | 191.776                  | -108.084         | 10.324            |
| High-haze FTO/mixed-SAM (no IPA rinse)                | 21.796                | 146.621                  | -112.745         | 2.056             |
| High-haze FTO/mixed-SAM (IPA-rinsed)                  | 33.623                | 258.636                  | -34.849          | 12.018            |
| High-haze FTO/DS-modified mixed-SAM (DS in IPA rinse) | 36.559                | 279.325                  | -52.100          | 20.848            |
| Low-haze FTO (bare)                                   | 14.092                | 98.633                   | -15.836          | 4.311             |
| Low-haze FTO /mixed-SAM (IPA-rinsed)                  | 13.200                | 95.180                   | -14.154          | 21.218            |
| Low-haze FTO /DS-modified mixed-SAM (DS in IPA rinse) | 12.591                | 91.322                   | -32.348          | 14.473            |

$R_q$ : RMS roughness;  $R_{pv}$ : peak-to-valley height range. Phase values are extracted from NCM phase backward images.

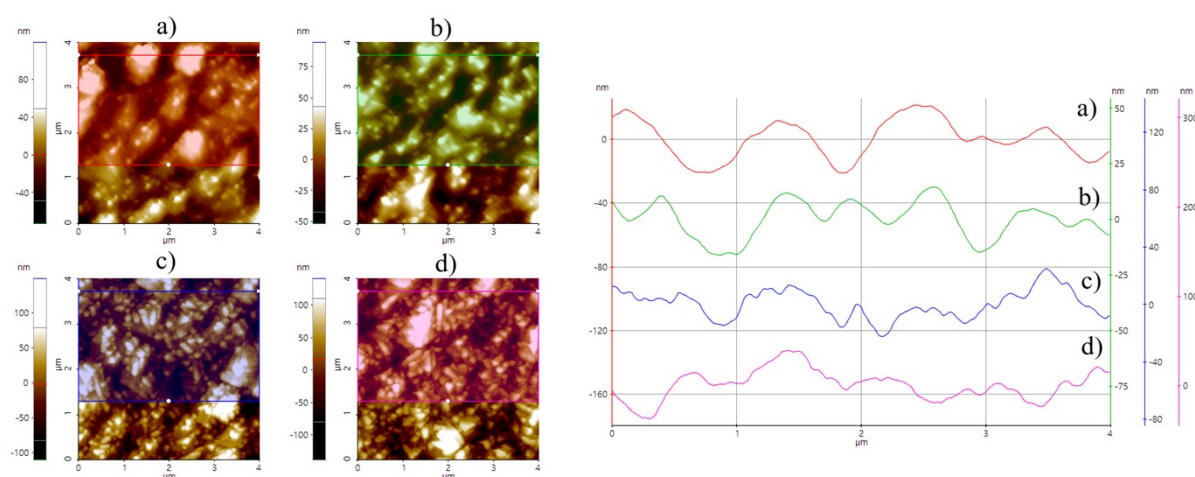

**Figure S4.** Representative AFM height maps ( $4 \times 4 \mu\text{m}^2$ ) and corresponding line profiles extracted along the same horizontal scan line (colored line) for high-haze FTO before and after mixed-SAM processing: (a) bare high-haze FTO, (b) FTO/mixed-SAM (non-rinsed), (c)

FTO/mixed-SAM after rinsing with IPA, and (d) FTO/DS-modified mixed-SAM after rinsing with DS-containing IPA.

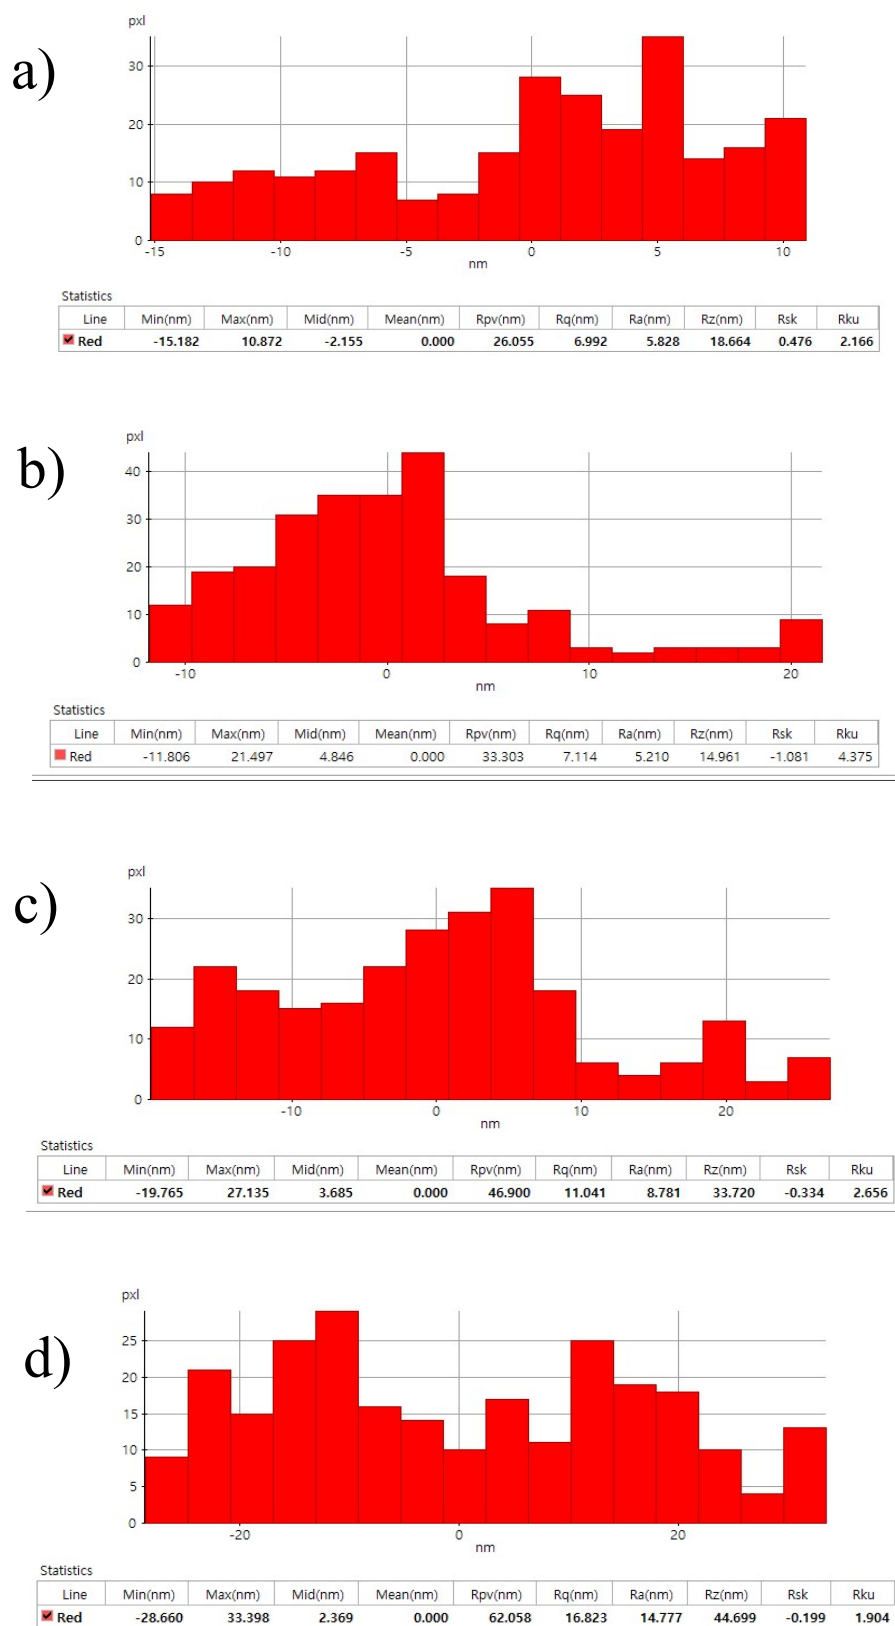

**Figure S5.** Scan-wide height-distribution (histogram) analysis derived from the  $4 \times 4 \mu\text{m}^2$  AFM height maps for high-haze FTO surfaces: (a) bare high-haze FTO, (b) FTO/mixed-SAM (non-

rinsed), (c) FTO/mixed-SAM after rinsing with IPA, and (d) FTO/DS-modified mixed-SAM after rinsing with DS-containing IPA.

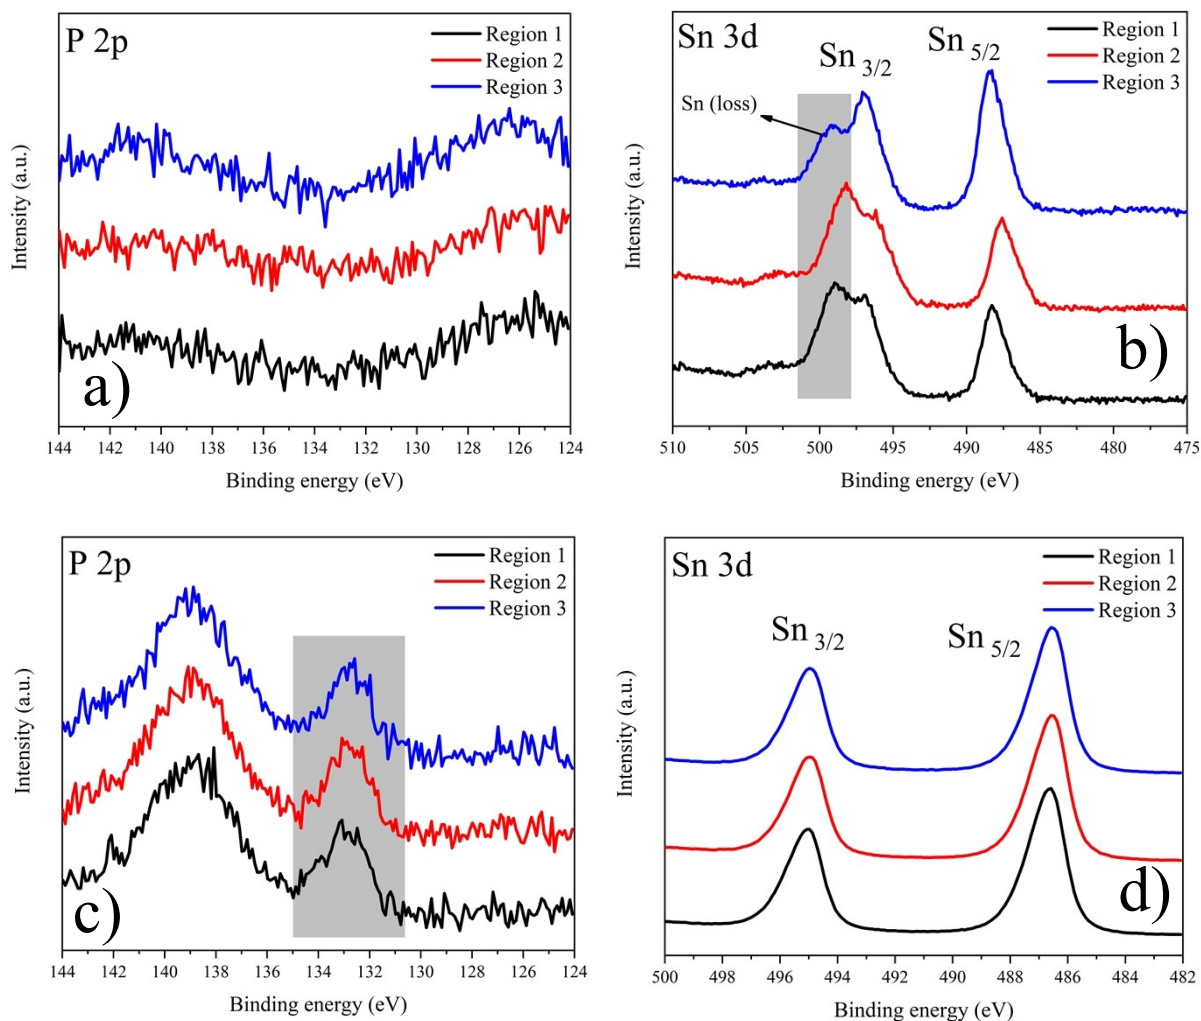

**Figure S6.** High-resolution a) P 2p and b) Sn 3d XPS spectra collected from three different spots (Region 1–3) on high-haze FTO/mixed-SAM (IPA rinsed) substrate. High-resolution c) P 2p and d) Sn 3d XPS spectra collected from three different spots (Region 1–3) on low-haze FTO/mixed-SAM (IPA rinsed) substrate.

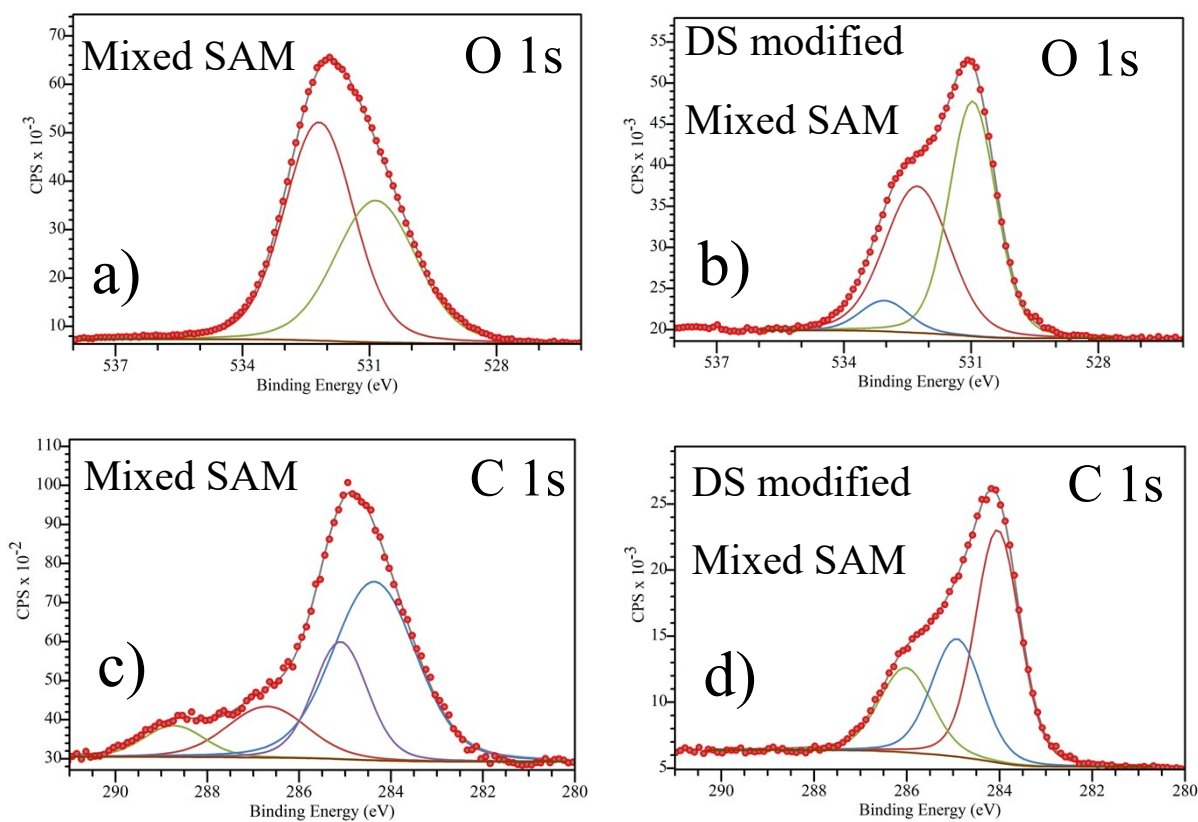

**Figure S7.** (a, b) O 1s and (c, d) C 1s XPS core-level spectra of (a) FTO/mixed-SAM and FTO/DS-modified mixed-SAM films.

**Table S2.** Peak fitting results of the O 1s XPS spectra for mixed SAM and DS modified SAM samples.

| <b>O 1s</b>                                                    | <b>Mixed SAM</b>   | <b>Relative area (%)</b> | <b>FWHM (eV)</b> |
|----------------------------------------------------------------|--------------------|--------------------------|------------------|
| lattice O <sup>2-</sup> (Sn–O)                                 | 530.87 eV          | 43.08                    | 2.24             |
| Surface –OH / adsorbed H <sub>2</sub> O/O <sub>x</sub> species | 532.09 eV          | 56.92                    | 1.92             |
| <b>O 1s</b>                                                    | <b>DS modified</b> | <b>Relative area (%)</b> | <b>FWHM (eV)</b> |
| lattice O <sup>2-</sup> (Sn–O)                                 | 530.98 eV          | 49.93                    | 1.30             |
| interfacial O (P–O–Sn)/surface –OH/adsorbates                  | 532.27 eV          | 43.29                    | 1.80             |
| hydroxyl-rich oxygen (polyol-related and/or strongly H-bonded) | 533.04 eV          | 6.78                     | 1.35             |

|            |  |  |  |
|------------|--|--|--|
| adsorbates |  |  |  |
|------------|--|--|--|

**Table S3.** Peak fitting results of the C 1s XPS spectra for mixed SAM and DS modified SAM samples.

| <b>C 1s</b>                                                                                        | <b>Mixed SAM</b>   | <b>Relative area (%)</b> | <b>FWHM (eV)</b> |
|----------------------------------------------------------------------------------------------------|--------------------|--------------------------|------------------|
| C–C / C=C (hydrocarbon/aromatic)                                                                   | 284.36             | 54.61                    | 2.12             |
| C–N and/or C–O (heteroatom-adjacent carbon)                                                        | 285.10             | 23.27                    | 1.38             |
| C–O (ether/alcohol; methoxy-rich and/or H-bonded C–O)                                              | 286.70             | 15.13                    | 2.05             |
| Carbonate/carboxylate-like surface adsorbates; possible adventitious carbon                        | 288.72             | 6.99                     | 1.54             |
| <b>C 1s</b>                                                                                        | <b>DS modified</b> | <b>Relative area (%)</b> | <b>FWHM (eV)</b> |
| C–C / C=C (hydrocarbon/aromatic)                                                                   | 284.14             | 44.86                    | 1.14             |
| C–C/C–H shoulder + heteroatom-adjacent C (C–N/C–O overlap)                                         | 284.91             | 35.64                    | 1.54             |
| Oxygenated carbon (C–O-dominant; alcohol/ether/polyol/methoxy environments; possible H-bonded C–O) | 286.09             | 19.50                    | 1.41             |

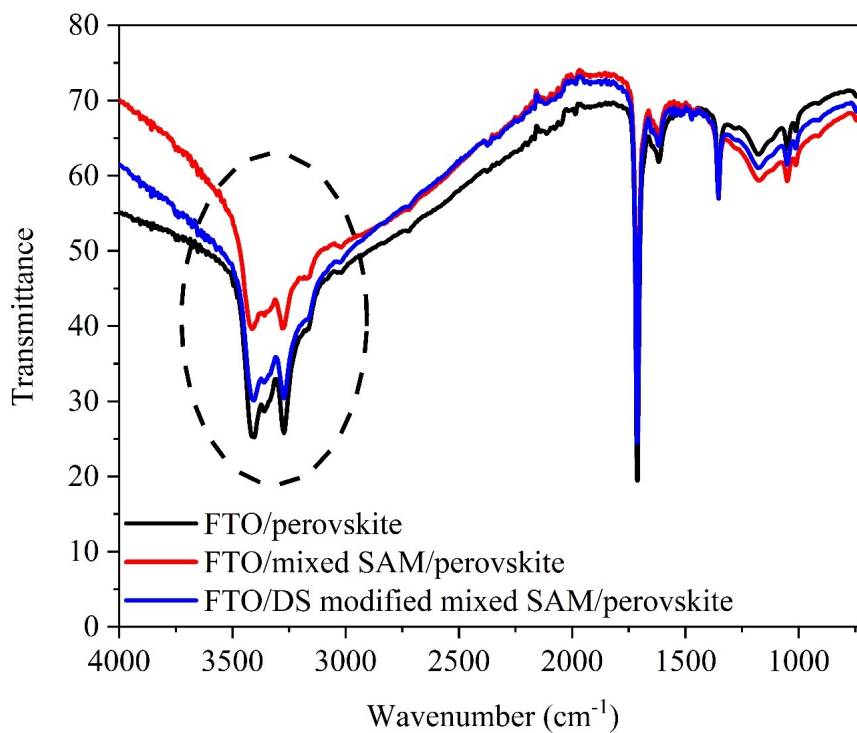

**Figure S8.** FTIR spectra of FTO/perovskite, FTO/mixed-SAM/perovskite, and FTO/DS-

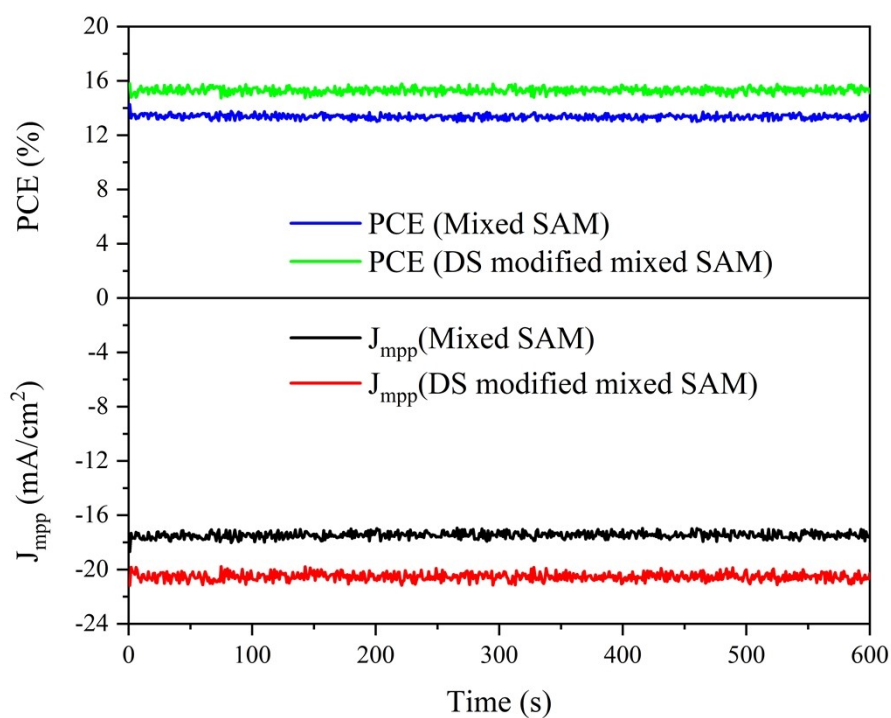

modified mixed-SAM/perovskite films.

**Figure S9.** Time-dependent maximum power point tracking of mixed-SAM and DS-modified mixed-SAM based PSCs measured for 600 s under continuous illumination. (The MPPT measurements were performed on an independently fabricated set of devices prepared under the same optimized conditions as the representative devices in the main text.)
